# Supplementary material for: Assessing the links among environmental contaminants, endocrinology, and parasites to understand amphibian declines in montane regions of Costa Rica
Source: PLoS One. 2018 Jan 11;13(1):e0191183. doi: 10.1371/journal.pone.0191183 (PMC5764372; doi:10.1371/journal.pone.0191183)
Supplement: S1 Table — Column headers are defined as follows: SMSO Field No. = Collection number; Morphospecies = Type identified in the field; Locality = Collection site; Site Type = High or Low elevation site; Region = North or South latitude; Position Found in Smilisca = Location in body where nematode was found; Bit-score = megaBLAST bit score; % Identical Sites = Percent of identical sites between query sequence and BLAST hit; % Pairwise Identity = Percent of identical sites between pairwise alignment between query and subject sequence; E-value = Expectation value of the probability to obtain score after correction for multiple testing; Grade = Percentage calculated by combining weighted query, e-value, and identity value hits; Accession = Genbank accession number of subject sequence; Organism = Organism of subject sequence; Description = Full description of hit sequence. (CSV) [file pone.0191183.s003.csv]

SMSO Field No.	Morphospecies	Locality	Site Type	Region	Positon Found in Smilisca	Bit-Score	% Identical Sites	% Pairwise Identity	E Value	Grade	Hit start	Hit end	Max Sequence Length	Min Sequence Length	Accession	Organism	Description
35	Black.stripe	Quebrada Cantarrana	High	South	Lung	1221.76	96.40%	96.40%	0	98.20%	123	860	747	738	AF082997	Rhabditoides regina	Rhabditoides regina strain DF5012 18S ribosomal RNA gene, partial sequence
35	Black.stripe	Quebrada Cantarrana	High	South	Lung	736.087	84.70%	84.70%	0	92.30%	123	861	747	739	EF990716	Teratorhabditis mariannae	Teratorhabditis mariannae strain SB170 18S ribosomal RNA gene, partial sequence
35	Black.stripe	Quebrada Cantarrana	High	South	Lung	734.24	84.60%	84.60%	0	92.30%	61	803	747	743	KX023407	Distolabrellus veechi	Distolabrellus veechi isolate n4 18S ribosomal RNA gene, partial sequence
35	Black.stripe	Quebrada Cantarrana	High	South	Lung	734.24	84.60%	84.60%	0	92.30%	31	773	747	743	KX023405	Distolabrellus veechi	Distolabrellus veechi isolate n2 18S ribosomal RNA gene, partial sequence
35	Black.stripe	Quebrada Cantarrana	High	South	Lung	734.24	84.60%	84.60%	0	92.30%	32	774	747	743	KX023404	Distolabrellus veechi	Distolabrellus veechi isolate n1 18S ribosomal RNA gene, partial sequence
51	Black.stripe	Rio Jaba	High	South	Lung	1221.76	96.40%	96.40%	0	98.20%	123	860	747	738	AF082997	Rhabditoides regina	Rhabditoides regina strain DF5012 18S ribosomal RNA gene, partial sequence
51	Black.stripe	Rio Jaba	High	South	Lung	736.087	84.70%	84.70%	0	92.30%	123	861	747	739	EF990716	Teratorhabditis mariannae	Teratorhabditis mariannae strain SB170 18S ribosomal RNA gene, partial sequence
51	Black.stripe	Rio Jaba	High	South	Lung	734.24	84.60%	84.60%	0	92.30%	61	803	747	743	KX023407	Distolabrellus veechi	Distolabrellus veechi isolate n4 18S ribosomal RNA gene, partial sequence
51	Black.stripe	Rio Jaba	High	South	Lung	734.24	84.60%	84.60%	0	92.30%	31	773	747	743	KX023405	Distolabrellus veechi	Distolabrellus veechi isolate n2 18S ribosomal RNA gene, partial sequence
51	Black.stripe	Rio Jaba	High	South	Lung	734.24	84.60%	84.60%	0	92.30%	32	774	747	743	KX023404	Distolabrellus veechi	Distolabrellus veechi isolate n1 18S ribosomal RNA gene, partial sequence
51	Long.orange	Rio Jaba	High	South	Upper intestine	917.059	99.20%	99.30%	0	99.50%	141	647	507	507	JX877669	Oswaldocruzia sp.	Oswaldocruzia sp. RPS-2013 18S ribosomal RNA gene, partial sequence
51	Long.orange	Rio Jaba	High	South	Upper intestine	911.519	99.00%	99.10%	0	99.40%	214	720	507	507	AJ920359	Tetrabothriostrongylus mackerrasae	Tetrabothriostrongylus mackerrasae 18S rRNA gene
51	Long.orange	Rio Jaba	High	South	Upper intestine	900.439	98.60%	98.70%	0	99.20%	214	720	507	507	AJ920354	Filarinema flagrifer	Filarinema flagrifer 18S rRNA gene
51	Long.orange	Rio Jaba	High	South	Upper intestine	900.439	98.60%	98.70%	0	99.20%	214	720	507	507	AJ920352	Ostertagia ostertagi	Ostertagia ostertagi 18S rRNA gene
51	Long.orange	Rio Jaba	High	South	Upper intestine	894.899	98.40%	98.50%	0	99.10%	148	654	507	507	JX877684	Austrostrongylus victoriensis	Austrostrongylus victoriensis isolate Av1 18S ribosomal RNA gene, partial sequence
61	Long.orange	Quebrada Cantarrana	High	South	Upper intestine	856.119	99.20%	99.20%	0	99.60%	137	610	474	474	JX877669	Oswaldocruzia sp.	Oswaldocruzia sp. RPS-2013 18S ribosomal RNA gene, partial sequence
61	Long.orange	Quebrada Cantarrana	High	South	Upper intestine	850.579	98.90%	99.00%	0	99.50%	210	683	474	474	AJ920359	Tetrabothriostrongylus mackerrasae	Tetrabothriostrongylus mackerrasae 18S rRNA gene
61	Long.orange	Quebrada Cantarrana	High	South	Upper intestine	839.499	98.50%	98.60%	0	99.30%	210	683	474	474	AJ920354	Filarinema flagrifer	Filarinema flagrifer 18S rRNA gene
61	Long.orange	Quebrada Cantarrana	High	South	Upper intestine	839.499	98.50%	98.60%	0	99.30%	210	683	474	474	AJ920352	Ostertagia ostertagi	Ostertagia ostertagi 18S rRNA gene
61	Long.orange	Quebrada Cantarrana	High	South	Upper intestine	833.959	98.30%	98.40%	0	99.20%	144	617	474	474	JX877684	Austrostrongylus victoriensis	Austrostrongylus victoriensis isolate Av1 18S ribosomal RNA gene, partial sequence
11	Long.white	Bijagual Field Station	High	North	Body cavity	1269.77	95.20%	95.20%	0	97.50%	118	915	811	798	DQ094175	Setaria digitata	Setaria digitata small subunit ribosomal RNA gene, partial sequence
11	Long.white	Bijagual Field Station	High	North	Body cavity	1264.23	95.10%	95.10%	0	97.40%	14	811	811	798	KT907507	Setaria yehi	Setaria yehi isolate MO-19 18S ribosomal RNA gene, partial sequence
11	Long.white	Bijagual Field Station	High	North	Body cavity	1264.23	95.10%	95.10%	0	97.40%	32	829	811	798	KT907506	Setaria yehi	Setaria yehi isolate MO-8 18S ribosomal RNA gene, partial sequence
11	Long.white	Bijagual Field Station	High	North	Body cavity	1264.23	95.10%	95.10%	0	97.40%	38	835	811	798	KT878970	Setaria yehi	Setaria yehi isolate SY-AK1 18S ribosomal RNA gene, partial sequence
11	Long.white	Bijagual Field Station	High	North	Body cavity	1264.23	95.10%	95.10%	0	97.40%	35	832	811	798	KT878969	Setaria yehi	Setaria yehi isolate D050915DP 18S ribosomal RNA gene, partial sequence
51	Long.white	Rio Jaba	High	South	Body cavity	1273.46	95.20%	95.20%	0	97.60%	116	915	813	800	DQ094175	Setaria digitata	Setaria digitata small subunit ribosomal RNA gene, partial sequence
51	Long.white	Rio Jaba	High	South	Body cavity	1267.92	95.10%	95.10%	0	97.50%	12	811	813	800	KT907507	Setaria yehi	Setaria yehi isolate MO-19 18S ribosomal RNA gene, partial sequence
51	Long.white	Rio Jaba	High	South	Body cavity	1267.92	95.10%	95.10%	0	97.50%	30	829	813	800	KT907506	Setaria yehi	Setaria yehi isolate MO-8 18S ribosomal RNA gene, partial sequence
51	Long.white	Rio Jaba	High	South	Body cavity	1267.92	95.10%	95.10%	0	97.50%	36	835	813	800	KT878970	Setaria yehi	Setaria yehi isolate SY-AK1 18S ribosomal RNA gene, partial sequence
51	Long.white	Rio Jaba	High	South	Body cavity	1267.92	95.10%	95.10%	0	97.50%	33	832	813	800	KT878969	Setaria yehi	Setaria yehi isolate D050915DP 18S ribosomal RNA gene, partial sequence
61	Long.white	Quebrada Cantarrana	High	South	Body cavity	1269.77	95.20%	95.20%	0	97.50%	118	915	811	798	DQ094175	Setaria digitata	Setaria digitata small subunit ribosomal RNA gene, partial sequence
61	Long.white	Quebrada Cantarrana	High	South	Body cavity	1264.23	95.10%	95.10%	0	97.40%	14	811	811	798	KT907507	Setaria yehi	Setaria yehi isolate MO-19 18S ribosomal RNA gene, partial sequence
61	Long.white	Quebrada Cantarrana	High	South	Body cavity	1264.23	95.10%	95.10%	0	97.40%	32	829	811	798	KT907506	Setaria yehi	Setaria yehi isolate MO-8 18S ribosomal RNA gene, partial sequence
61	Long.white	Quebrada Cantarrana	High	South	Body cavity	1264.23	95.10%	95.10%	0	97.40%	38	835	811	798	KT878970	Setaria yehi	Setaria yehi isolate SY-AK1 18S ribosomal RNA gene, partial sequence
61	Long.white	Quebrada Cantarrana	High	South	Body cavity	1264.23	95.10%	95.10%	0	97.40%	35	832	811	798	KT878969	Setaria yehi	Setaria yehi isolate D050915DP 18S ribosomal RNA gene, partial sequence
3	Long.white	Quebrada Bonita	Low	North	Body cavity	1273.46	95.20%	95.20%	0	97.60%	116	915	813	800	DQ094175	Setaria digitata	Setaria digitata small subunit ribosomal RNA gene, partial sequence
3	Long.white	Quebrada Bonita	Low	North	Body cavity	1267.92	95.10%	95.10%	0	97.50%	12	811	813	800	KT907507	Setaria yehi	Setaria yehi isolate MO-19 18S ribosomal RNA gene, partial sequence
3	Long.white	Quebrada Bonita	Low	North	Body cavity	1267.92	95.10%	95.10%	0	97.50%	30	829	813	800	KT907506	Setaria yehi	Setaria yehi isolate MO-8 18S ribosomal RNA gene, partial sequence
3	Long.white	Quebrada Bonita	Low	North	Body cavity	1267.92	95.10%	95.10%	0	97.50%	36	835	813	800	KT878970	Setaria yehi	Setaria yehi isolate SY-AK1 18S ribosomal RNA gene, partial sequence
3	Long.white	Quebrada Bonita	Low	North	Body cavity	1267.92	95.10%	95.10%	0	97.50%	33	832	813	800	KT878969	Setaria yehi	Setaria yehi isolate D050915DP 18S ribosomal RNA gene, partial sequence
73	Long.white	Rio Coto Colorado	Low	South	Body cavity	1273.46	95.20%	95.20%	0	97.60%	116	915	813	800	DQ094175	Setaria digitata	Setaria digitata small subunit ribosomal RNA gene, partial sequence
73	Long.white	Rio Coto Colorado	Low	South	Body cavity	1267.92	95.10%	95.10%	0	97.50%	12	811	813	800	KT907507	Setaria yehi	Setaria yehi isolate MO-19 18S ribosomal RNA gene, partial sequence
73	Long.white	Rio Coto Colorado	Low	South	Body cavity	1267.92	95.10%	95.10%	0	97.50%	30	829	813	800	KT907506	Setaria yehi	Setaria yehi isolate MO-8 18S ribosomal RNA gene, partial sequence
73	Long.white	Rio Coto Colorado	Low	South	Body cavity	1267.92	95.10%	95.10%	0	97.50%	36	835	813	800	KT878970	Setaria yehi	Setaria yehi isolate SY-AK1 18S ribosomal RNA gene, partial sequence
73	Long.white	Rio Coto Colorado	Low	South	Body cavity	1267.92	95.10%	95.10%	0	97.50%	33	832	813	800	KT878969	Setaria yehi	Setaria yehi isolate D050915DP 18S ribosomal RNA gene, partial sequence
95	Short.white	Bijagual Field Station	High	North	Lower intestine	1411.96	98.60%	98.60%	0	99.30%	110	906	798	797	DQ503461	Raillietnema sp.	Raillietnema sp. V3060 18S ribosomal RNA gene, partial sequence
95	Short.white	Bijagual Field Station	High	North	Lower intestine	1386.11	98.00%	98.00%	0	99.00%	130	928	799	798	LC018444	Cosmocercoides pulcher	Cosmocercoides pulcher genes for 18S rRNA, ITS1, 5.8S rRNA, ITS2, 28S rRNA, partial and complete sequence, specimen_voucher: MPM Coll. No. 20969
95	Short.white	Bijagual Field Station	High	North	Lower intestine	1386.11	98.00%	98.00%	0	99.00%	56	854	799	798	FJ516753	Cosmocercoides dukae	Cosmocercoides dukae 18S ribosomal RNA gene, partial sequence
95	Short.white	Bijagual Field Station	High	North	Lower intestine	1386.11	98.00%	98.00%	0	99.00%	130	928	799	798	AB908160	Cosmocercoides tonkinensis	Cosmocercoides tonkinensis genes for 18S rRNA, ITS1, 5.8S rRNA, ITS2, 28S rRNA, partial and complete sequence, country: Viet Nam: Thanh Hoa Province, Pu Hu
95	Short.white	Bijagual Field Station	High	North	Lower intestine	1373.18	97.70%	97.70%	0	98.90%	19	815	798	797	JX101958	Ichthyocephaloides sumbatus	Ichthyocephaloides sumbatus voucher IPEE RAS:1175 18S ribosomal RNA gene, partial sequence
51	Short.white	Rio Jaba	High	South	Lower intestine	1411.96	98.60%	98.60%	0	99.30%	110	906	798	797	DQ503461	Raillietnema sp.	Raillietnema sp. V3060 18S ribosomal RNA gene, partial sequence
51	Short.white	Rio Jaba	High	South	Lower intestine	1386.11	98.00%	98.00%	0	99.00%	130	928	799	798	LC018444	Cosmocercoides pulcher	Cosmocercoides pulcher genes for 18S rRNA, ITS1, 5.8S rRNA, ITS2, 28S rRNA, partial and complete sequence, specimen_voucher: MPM Coll. No. 20969
51	Short.white	Rio Jaba	High	South	Lower intestine	1386.11	98.00%	98.00%	0	99.00%	56	854	799	798	FJ516753	Cosmocercoides dukae	Cosmocercoides dukae 18S ribosomal RNA gene, partial sequence
51	Short.white	Rio Jaba	High	South	Lower intestine	1386.11	98.00%	98.00%	0	99.00%	130	928	799	798	AB908160	Cosmocercoides tonkinensis	Cosmocercoides tonkinensis genes for 18S rRNA, ITS1, 5.8S rRNA, ITS2, 28S rRNA, partial and complete sequence, country: Viet Nam: Thanh Hoa Province, Pu Hu
51	Short.white	Rio Jaba	High	South	Lower intestine	1373.18	97.70%	97.70%	0	98.90%	19	815	798	797	JX101958	Ichthyocephaloides sumbatus	Ichthyocephaloides sumbatus voucher IPEE RAS:1175 18S ribosomal RNA gene, partial sequence
58	Short.white	Quebrada Cantarrana	High	South	Lower intestine	1411.96	98.60%	98.60%	0	99.30%	110	906	798	797	DQ503461	Raillietnema sp.	Raillietnema sp. V3060 18S ribosomal RNA gene, partial sequence
58	Short.white	Quebrada Cantarrana	High	South	Lower intestine	1386.11	98.00%	98.00%	0	99.00%	130	928	799	798	LC018444	Cosmocercoides pulcher	Cosmocercoides pulcher genes for 18S rRNA, ITS1, 5.8S rRNA, ITS2, 28S rRNA, partial and complete sequence, specimen_voucher: MPM Coll. No. 20969
58	Short.white	Quebrada Cantarrana	High	South	Lower intestine	1386.11	98.00%	98.00%	0	99.00%	56	854	799	798	FJ516753	Cosmocercoides dukae	Cosmocercoides dukae 18S ribosomal RNA gene, partial sequence
58	Short.white	Quebrada Cantarrana	High	South	Lower intestine	1386.11	98.00%	98.00%	0	99.00%	130	928	799	798	AB908160	Cosmocercoides tonkinensis	Cosmocercoides tonkinensis genes for 18S rRNA, ITS1, 5.8S rRNA, ITS2, 28S rRNA, partial and complete sequence, country: Viet Nam: Thanh Hoa Province, Pu Hu
58	Short.white	Quebrada Cantarrana	High	South	Lower intestine	1373.18	97.70%	97.70%	0	98.90%	19	815	798	797	JX101958	Ichthyocephaloides sumbatus	Ichthyocephaloides sumbatus voucher IPEE RAS:1175 18S ribosomal RNA gene, partial sequence
121	Short.white	Quebrada Pita	Low	North	Lower intestine	1411.96	98.60%	98.60%	0	99.30%	906	110	798	797	DQ503461	Raillietnema sp. V3060	Raillietnema sp. V3060 18S ribosomal RNA gene, partial sequence
121	Short.white	Quebrada Pita	Low	North	Lower intestine	1386.11	98.00%	98.00%	0	99.00%	928	130	799	798	LC018444	Cosmocercoides pulcher	Cosmocercoides pulcher genes for 18S rRNA, ITS1, 5.8S rRNA, ITS2, 28S rRNA, partial and complete sequence, specimen_voucher: MPM Coll. No. 20969
121	Short.white	Quebrada Pita	Low	North	Lower intestine	1386.11	98.00%	98.00%	0	99.00%	854	56	799	798	FJ516753	Cosmocercoides dukae	Cosmocercoides dukae 18S ribosomal RNA gene, partial sequence
121	Short.white	Quebrada Pita	Low	North	Lower intestine	1386.11	98.00%	98.00%	0	99.00%	928	130	799	798	AB908160	Cosmocercoides tonkinensis	Cosmocercoides tonkinensis genes for 18S rRNA, ITS1, 5.8S rRNA, ITS2, 28S rRNA, partial and complete sequence, country: Viet Nam: Thanh Hoa Province, Pu Hu
121	Short.white	Quebrada Pita	Low	North	Lower intestine	1373.18	97.70%	97.70%	0	98.90%	815	19	798	797	JX101958	Ichthyocephaloides sumbatus	Ichthyocephaloides sumbatus voucher IPEE RAS:1175 18S ribosomal RNA gene, partial sequence
